# Supplementary material
Source: Springer Nature journal article supplement (https://www.springermedizin.de/resource/supplementary/13075_2009_2884_MOESM1_ESM.pdf/9693102)

Placebo Adalimumab

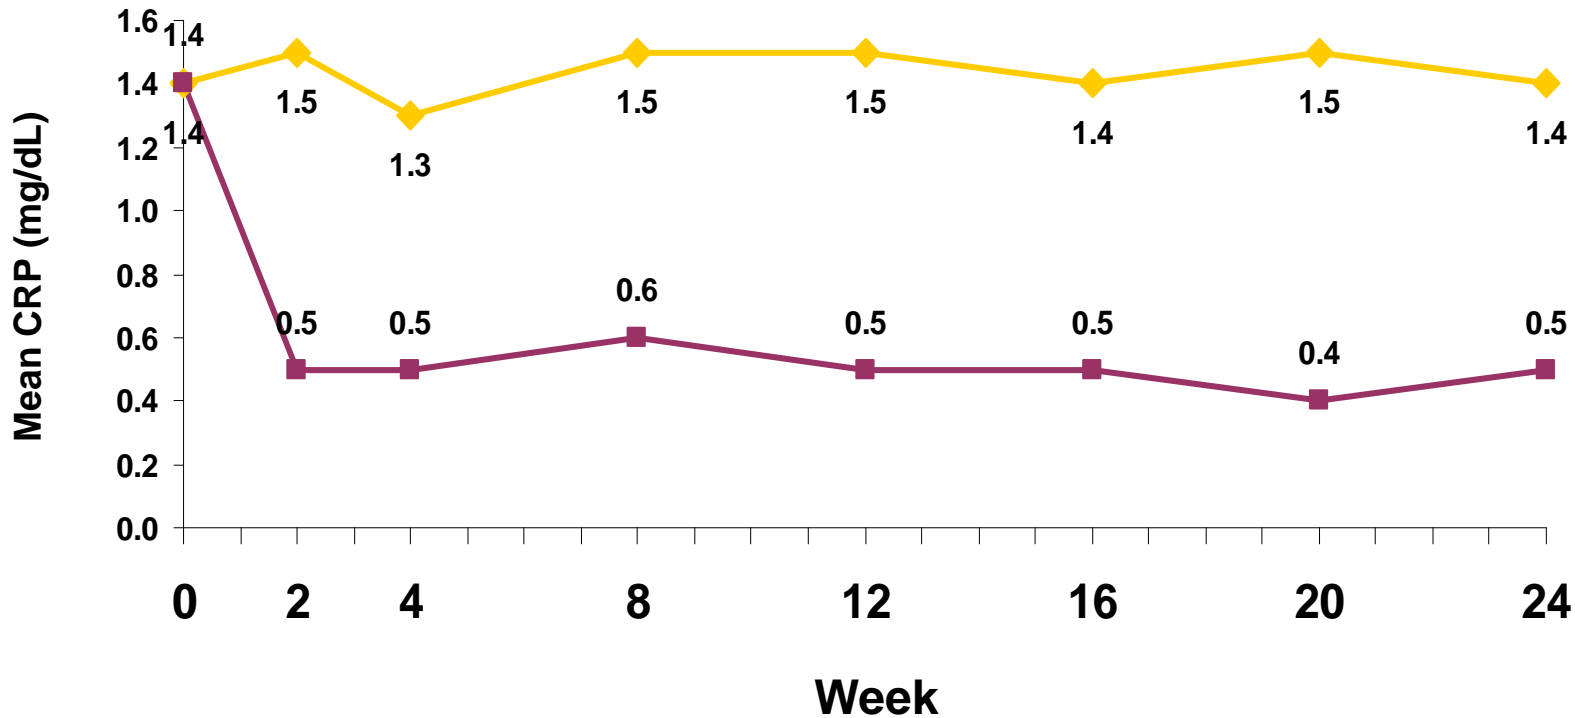

Supplement: MOESM1 [file 9693102]
